# Supplementary material for: Observational perspective on sudden stratospheric warmings and blocking from Eliassen–Palm fluxes
Source: Copernicus journal article supplement (doi:10.5194/acp-24-10893-2024), 2024-09-27
Supplement: Supplementary file 1 [file acp-24-10893-2024-supplement.pdf]

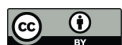

*Supplement of*

## **Observational perspective on sudden stratospheric warmings and blocking from Eliassen–Palm fluxes**

**Kamilya Yessimbet et al.**

*Correspondence to:* Kamilya Yessimbet ([kamilya.yessimbet@uni-graz.at](mailto:kamilya.yessimbet@uni-graz.at))

The copyright of individual parts of the supplement might differ from the article licence.

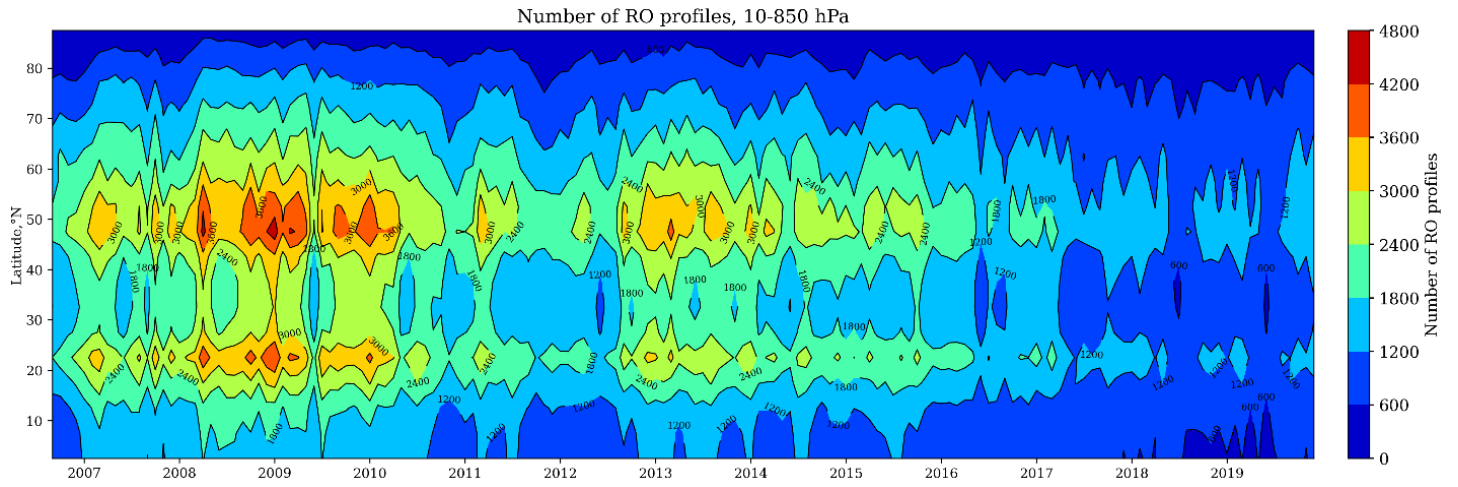

**Figure S1:** Zonal distribution of the monthly number of the RO profiles averaged over 10 to 850 hPa for the period from September 2006 to December 2019.

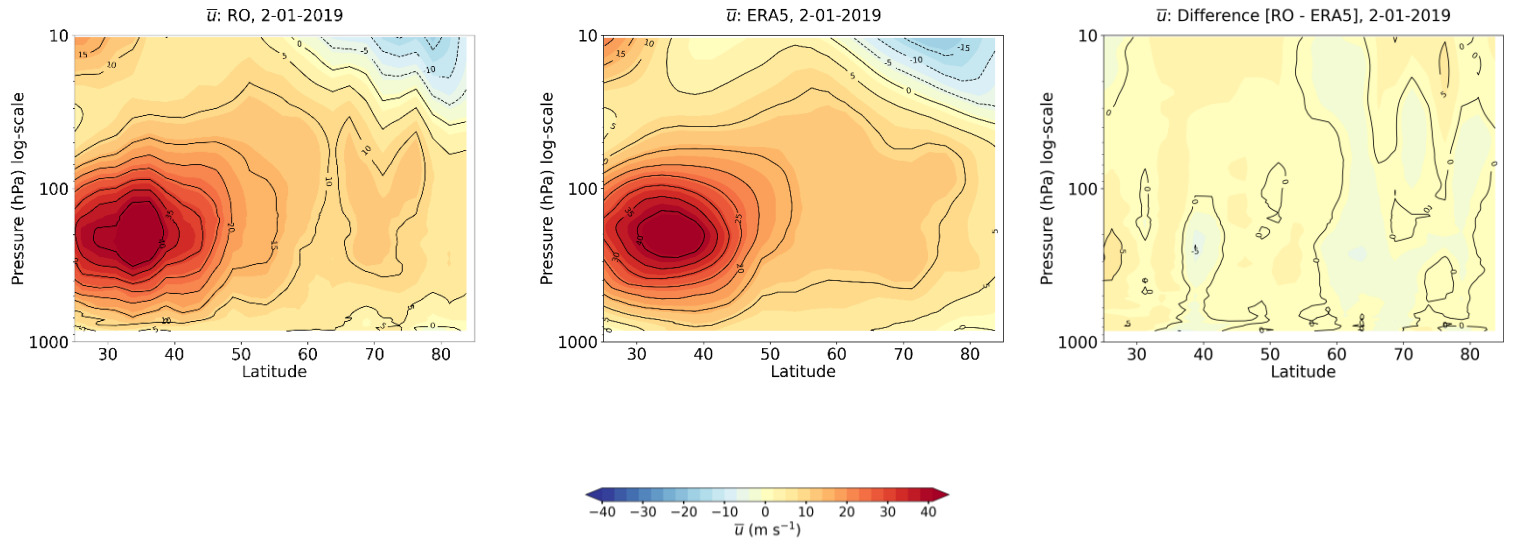

**Figure S2:** Zonal-mean zonal wind computed from RO (geostrophic wind; left) and ERA5 (real wind; right) and their difference for an exemplary day.

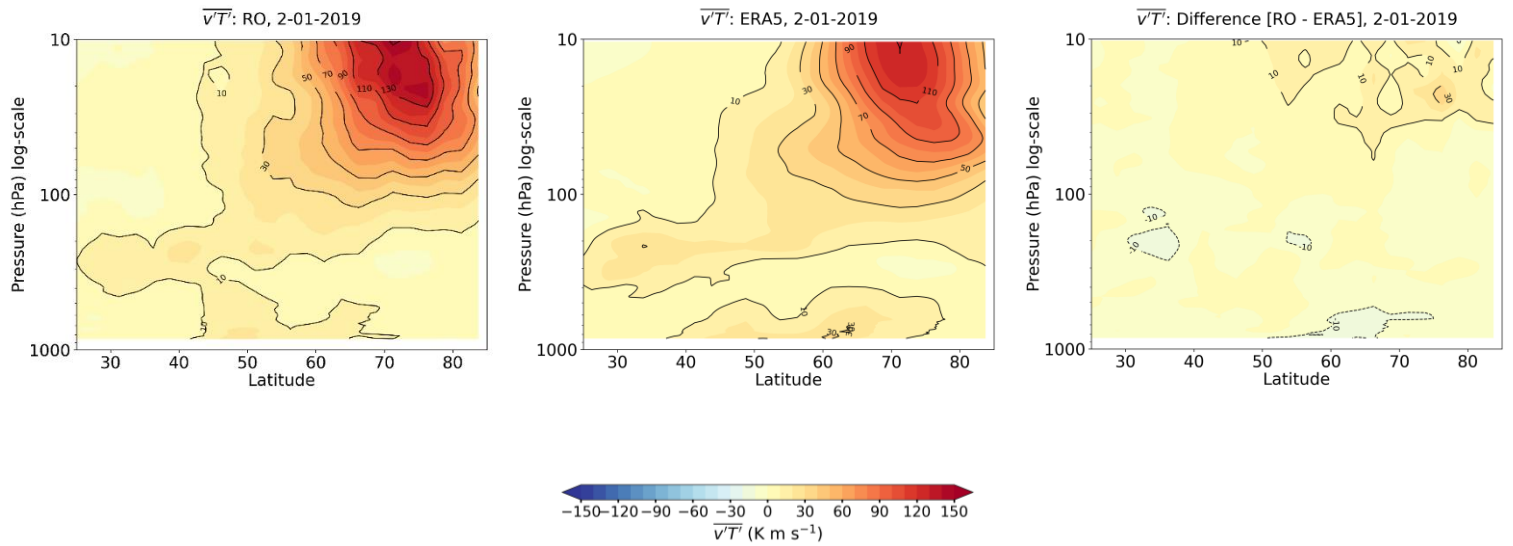

**Figure S3:** Eddy meridional heat flux computed from RO (using geostrophic meridional wind; left) and ERA5 (using real meridional wind; right) and their difference for an exemplary day.

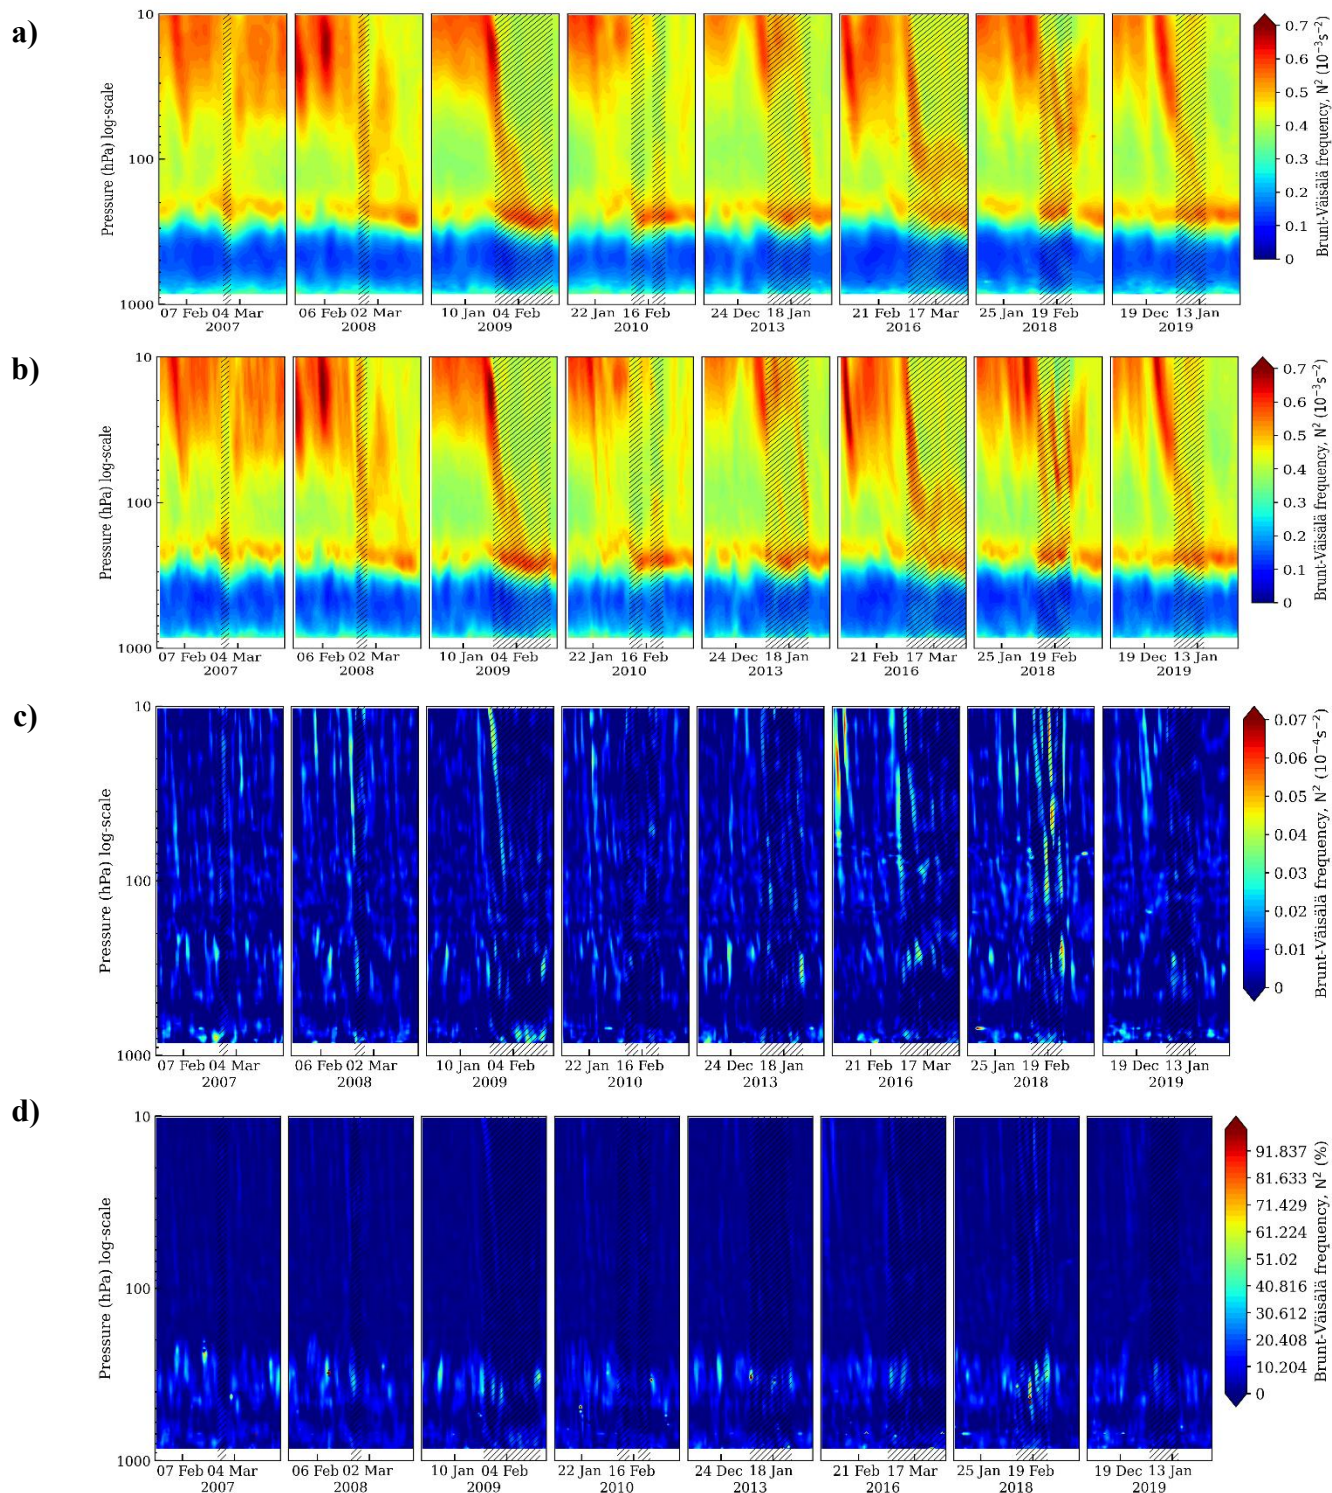

**Figure S4:** Brunt Väisälä frequency computed from RO (a) and ERA5 (b) and their difference (c) and difference in percentage (d) averaged over 75-90° N within a +/- 30 day timeframe relative to each of the SSW events from 2007 to 2019. Hatched regions indicate dates when the zonal-mean zonal wind at 60° N and 10 hPa is negative.
